# Supplementary material for: Regulation of internal reorganization energy to change the non-radiative channel in the Ir(iii) complex: the role of N atoms
Source: Royal Society of Chemistry journal article supplement (doi:10.1039/d3nj01101a), 2023-01-01
Supplement: d3nj01101a1.pdf [file d3nj01101a1.pdf]

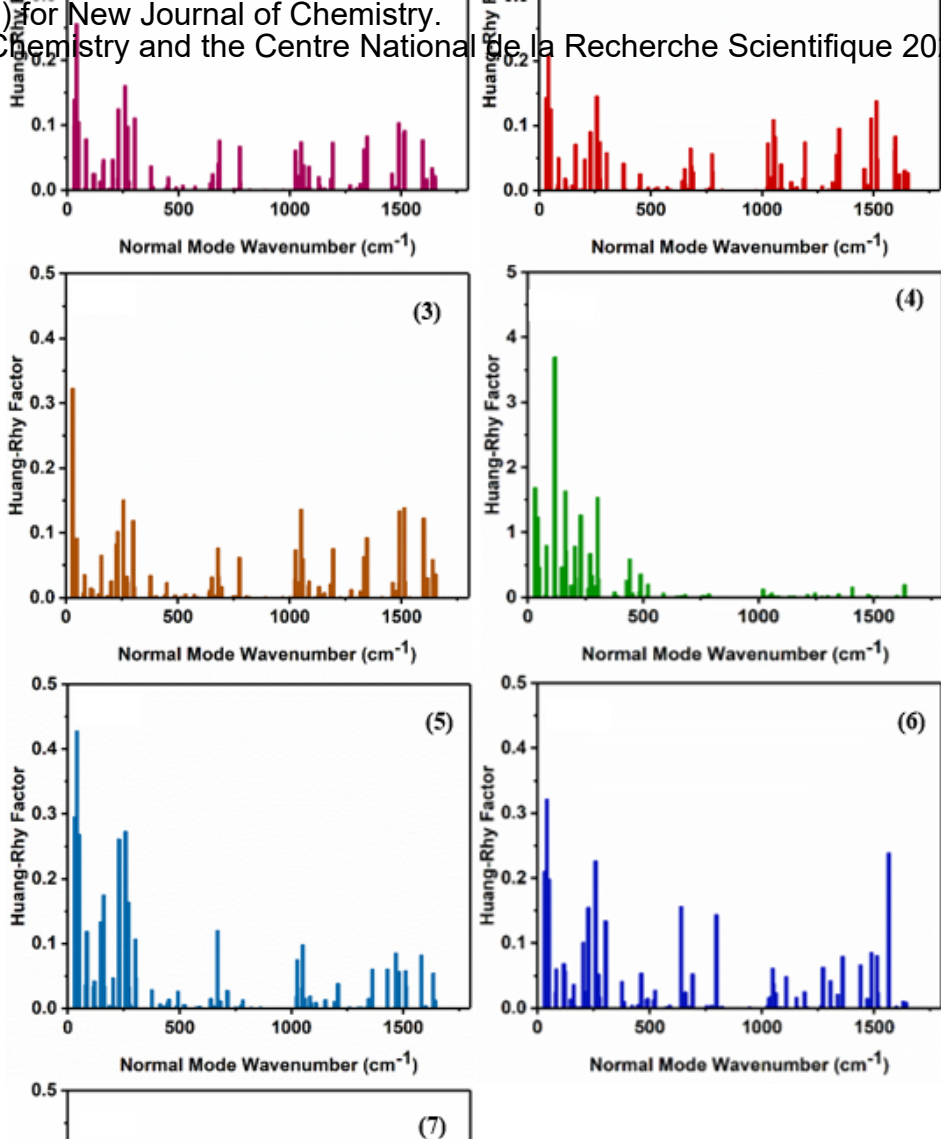

Figure. S1 The calculated Huang-Rhys factors versus the normal mode wavenumber at the ground state for **complexes 1, 2, 5, 6, 7, 8, 10**.

Table S1. The selected bond lengths (Å), angles (°) and dihedral angles (°) of the  $S_0$  and  $T_1$  states and the corresponding modification between the two states for **1**.

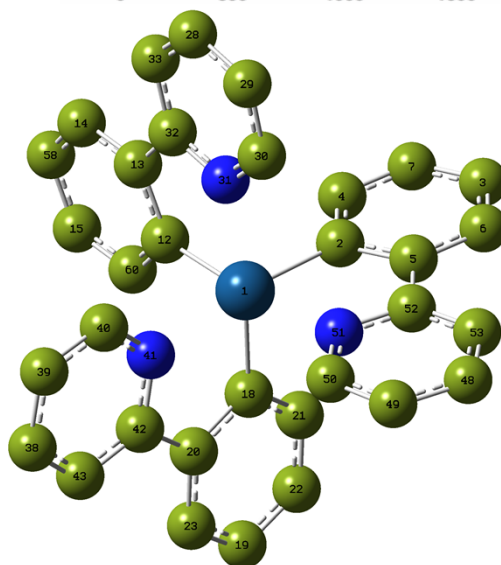

|                  | S <sub>0</sub> | T <sub>1</sub> | Δ (T <sub>1</sub> -S <sub>0</sub> ) |
|------------------|----------------|----------------|-------------------------------------|
| L(Ir1-C2)        | 2.026          | 2.023          | -0.003                              |
| L(Ir1-C12)       | 2.027          | 1.983          | -0.044                              |
| L(Ir1-C18)       | 2.027          | 2.041          | 0.014                               |
| L(Ir1-N31)       | 2.190          | 2.156          | -0.034                              |
| L(Ir1-N41)       | 2.189          | 2.205          | 0.016                               |
| L(Ir1-N51)       | 2.190          | 2.213          | 0.023                               |
| A(Ir1-C2-N51)    | 53.33          | 53.89          | 0.56                                |
| A(Ir1-N41-N51)   | 41.87          | 42.61          | 0.74                                |
| D(Ir1-C2-C5-C52) | 0.580          | 0.78           | 0.2                                 |
| D(C2-C5-C52-N51) | -1.420         | -1.09          | 0.33                                |
| Benzene ligands  |                |                |                                     |
| C6-C5            | 1.41           | 1.41           | 0.00                                |
| C5-C2            | 1.43           | 1.43           | 0.00                                |
| C2-C4            | 1.41           | 1.41           | 0.00                                |
| C4-C7            | 1.39           | 1.39           | 0.00                                |
| C7-C3            | 1.40           | 1.40           | 0.00                                |
| C3-C6            | 1.39           | 1.39           | 0.00                                |
| C5-C52           | 1.46           | 1.46           | 0.00                                |
| Pyridine ligands |                |                |                                     |
| C48-C49          | 1.40           | 1.40           | 0.00                                |
| C49-C50          | 1.39           | 1.39           | 0.00                                |
| C50-N51          | 1.34           | 1.34           | 0.00                                |
| N51-C52          | 1.36           | 1.36           | 0.00                                |
| C52-C53          | 1.41           | 1.41           | 0.00                                |
| C53-C48          | 1.39           | 1.39           | 0.00                                |

Table S2. The selected bond lengths (Å), angles (°) and dihedral angles (°) of the S<sub>0</sub> and T<sub>1</sub> states and the corresponding modification between the two states for **2**.

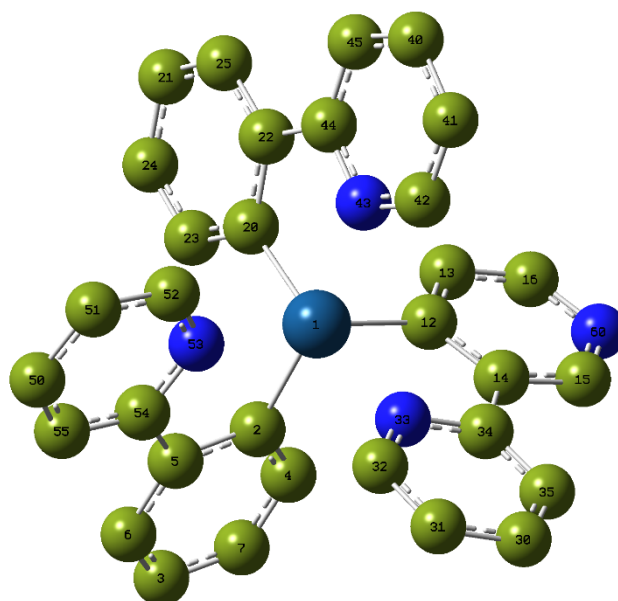

|                               | $S_0$ | $T_1$ | $\Delta (T_1-S_0)$ |
|-------------------------------|-------|-------|--------------------|
| L(Ir1-C2)                     | 2.028 | 2.041 | 0.013              |
| L(Ir1-C12)                    | 2.015 | 2.023 | 0.008              |
| L(Ir1-C20)                    | 2.027 | 1.983 | -0.044             |
| L(Ir1-N33)                    | 2.197 | 2.213 | 0.016              |
| L(Ir1-N43)                    | 2.193 | 2.156 | -0.037             |
| L(Ir1-N53)                    | 2.188 | 2.205 | 0.017              |
| A(Ir1-C12-N33)                | 53.63 | 53.35 | 0.28               |
| A(Ir1-N53-N33)                | 41.91 | 43.37 | 1.46               |
| D(Ir1-C12-C14-C33)            | 0.58  | 0.60  | 0.02               |
| D(C12-C14-C34-N33)            | -1.55 | -1.52 | 0.03               |
| N-substituted benzene ligands |       |       |                    |
| C15-C14                       | 1.40  | 1.40  | 0.00               |
| C14-C12                       | 1.43  | 1.42  | 0.01               |
| C12-C13                       | 1.41  | 1.40  | 0.01               |
| C13-C16                       | 1.39  | 1.39  | 0.00               |
| C16-N60                       | 1.35  | 1.34  | 0.01               |
| N60-C15                       | 1.33  | 1.33  | 0.00               |
| C14-C34                       | 1.46  | 1.47  | 0.01               |

Table S3. The selected bond lengths ( $\text{\AA}$ ), angles ( $^\circ$ ) and dihedral angles ( $^\circ$ ) of the  $S_0$  and  $T_1$  states and the corresponding modification between the two states for **3**.

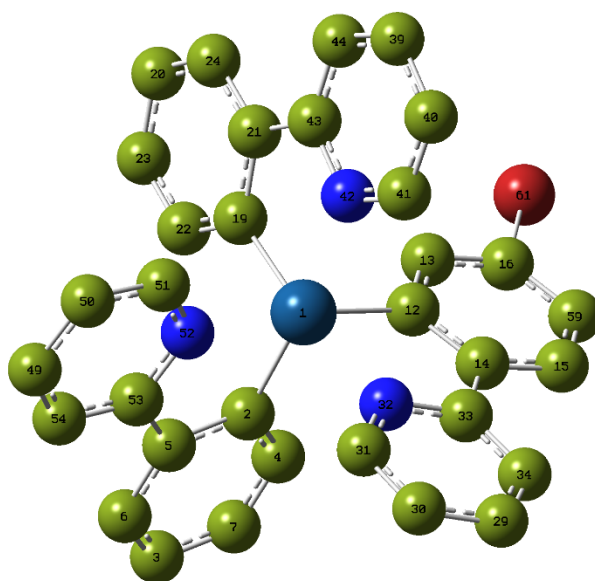

|                                | $S_0$  | $T_1$  | $\Delta (T_1-S_0)$ |
|--------------------------------|--------|--------|--------------------|
| L(Ir1-C2)                      | 2.027  | 1.984  | -0.043             |
| L(Ir1-C12)                     | 2.024  | 2.038  | 0.014              |
| L(Ir1-C19)                     | 2.027  | 2.024  | -0.003             |
| L(Ir1-N32)                     | 2.192  | 2.206  | 0.014              |
| L(Ir1-N42)                     | 2.191  | 2.213  | 0.022              |
| L(Ir1-N52)                     | 2.183  | 2.150  | -0.033             |
| A(Ir1-C12-N32)                 | 53.44  | 53.42  | -0.020             |
| A(Ir1-N52-N32)                 | 41.99  | 43.57  | 1.580              |
| D(Ir1-C12-C14-C33)             | 1.302  | 0.290  | -1.012             |
| D(C12-C14-C33-N32)             | -1.667 | -1.447 | 0.220              |
| Br-substituted benzene ligands |        |        |                    |
| C15-C14                        | 1.406  | 1.406  | 0.00               |
| C14-C12                        | 1.427  | 1.426  | -0.001             |
| C12-C13                        | 1.410  | 1.408  | -0.002             |
| C13-C16                        | 1.388  | 1.389  | 0.001              |
| C16-C59                        | 1.395  | 1.394  | -0.001             |
| C59-C15                        | 1.389  | 1.390  | 0.001              |
| C14-C33                        | 1.466  | 1.468  | 0.002              |
| C16-Br51                       | 1.982  | 1.980  | -0.002             |

Table S4. The selected bond lengths ( $\text{\AA}$ ), angles ( $^\circ$ ) and dihedral angles ( $^\circ$ ) of the  $S_0$  and  $T_1$  states and the corresponding modification between the two states for **4**.

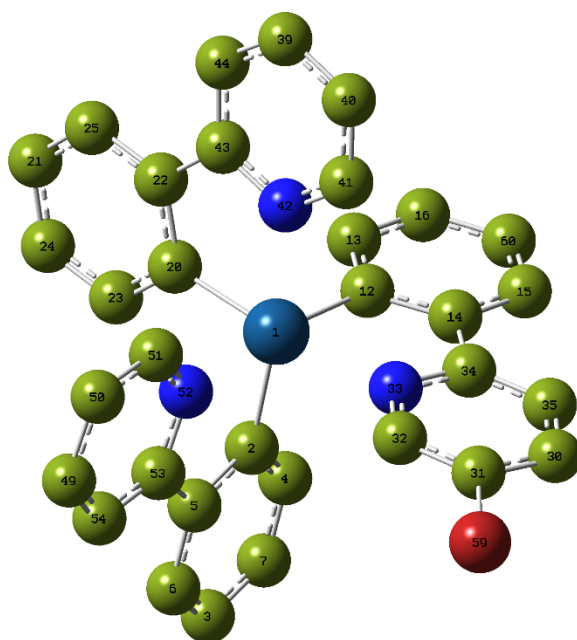

|                                 | $S_0$  | $T_1$  | $\Delta (T_1-S_0)$ |
|---------------------------------|--------|--------|--------------------|
| L(Ir1-C2)                       | 2.028  | 2.024  | -0.004             |
| L(Ir1-C12)                      | 2.026  | 1.984  | -0.042             |
| L(Ir1-C20)                      | 2.026  | 2.039  | 0.013              |
| L(Ir1-N33)                      | 2.192  | 2.156  | -0.036             |
| L(Ir1-N42)                      | 2.190  | 2.204  | 0.014              |
| L(Ir1-N52)                      | 2.188  | 2.213  | 0.025              |
| A(Ir1-C12-N33)                  | 53.40  | 52.32  | -1.08              |
| A(Ir1-N52-N33)                  | 41.94  | 41.72  | -0.22              |
| D(Ir1-C12-C14-C34)              | 1.233  | -1.312 | -2.545             |
| D(C12-C14-C34-N33)              | -1.587 | 0.916  | 2.503              |
| Br-substituted pyridine ligands |        |        |                    |
| C30-C31                         | 1.394  | 1.430  | 0.036              |
| C31-C32                         | 1.386  | 1.382  | -0.004             |
| C32-N33                         | 1.343  | 1.341  | -0.002             |
| N33-C34                         | 1.365  | 1.420  | 0.055              |
| C34-C35                         | 1.407  | 1.426  | 0.019              |
| C35-C30                         | 1.387  | 1.370  | -0.017             |
| C34-C14                         | 1.463  | 1.413  | -0.050             |
| C31-Br59                        | 1.961  | 1.961  | 0.000              |

Table S5. The selected bond lengths ( $\text{\AA}$ ), angles ( $^\circ$ ) and dihedral angles ( $^\circ$ ) of the  $S_0$  and  $T_1$  states and the corresponding modification between the two states for **5**.

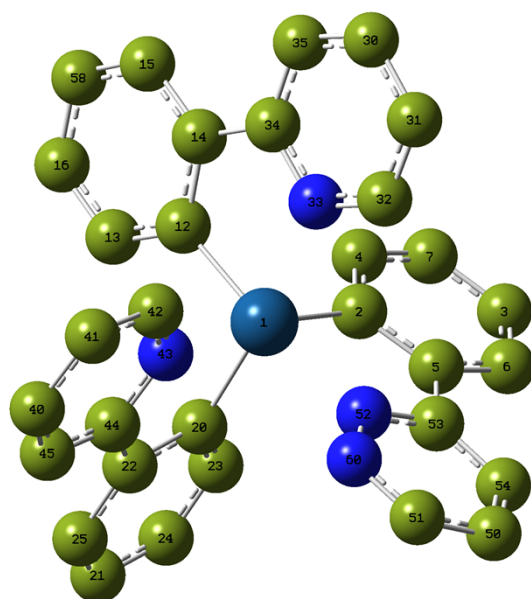

|                                | $S_0$ | $T_1$  | $\Delta (T_1-S_0)$ |
|--------------------------------|-------|--------|--------------------|
| L(Ir1-C2)                      | 2.025 | 2.041  | 0.016              |
| L(Ir1-C12)                     | 2.031 | 2.068  | 0.037              |
| L(Ir1-C20)                     | 2.029 | 1.991  | -0.038             |
| L(Ir1-N33)                     | 2.187 | 2.279  | 0.092              |
| L(Ir1-N43)                     | 2.182 | 2.203  | 0.021              |
| L(Ir1-N52)                     | 2.157 | 2.058  | -0.099             |
| A(Ir1-C2-N52)                  | 52.72 | 50.12  | -2.60              |
| A(Ir1-N43-N52)                 | 42.17 | 40.73  | -1.44              |
| D(Ir1-C2-C5-C53)               | -0.14 | -0.39  | -0.25              |
| D(C2-C5-C53-N52)               | -2.08 | -10.03 | -7.95              |
| N-substituted pyridine ligands |       |        |                    |
| C50-C51                        | 1.40  | 1.41   | 0.01               |
| C51-N60                        | 1.33  | 1.32   | 0.01               |
| N60-N52                        | 1.33  | 1.38   | 0.05               |
| N52-C53                        | 1.36  | 1.41   | 0.05               |
| C53-C54                        | 1.41  | 1.38   | 0.03               |
| C54-C50                        | 1.38  | 1.41   | 0.03               |
| C53-C5                         | 1.46  | 1.46   | 0.00               |

Table S6. The selected bond lengths ( $\text{\AA}$ ), angles ( $^\circ$ ) and dihedral angles ( $^\circ$ ) of the  $S_0$  and  $T_1$  states and the corresponding modification between the two states for **6**.

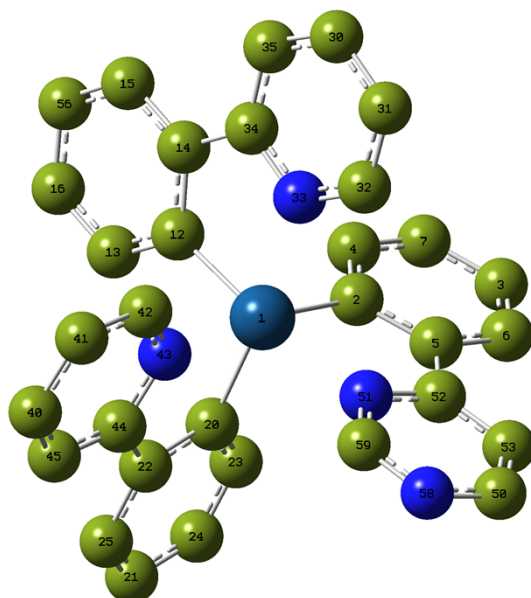

|                                | $S_0$ | $T_1$ | $\Delta (T_1-S_0)$ |
|--------------------------------|-------|-------|--------------------|
| L(Ir1-C2)                      | 2.025 | 1.978 | -0.047             |
| L(Ir1-C12)                     | 2.026 | 2.040 | 0.014              |
| L(Ir1-C20)                     | 2.029 | 2.026 | -0.003             |
| L(Ir1-N33)                     | 2.192 | 2.202 | 0.01               |
| L(Ir1-N43)                     | 2.187 | 2.222 | 0.035              |
| L(Ir1-N51)                     | 2.190 | 2.162 | -0.028             |
| A(Ir1-C2-N51)                  | 53.45 | 52.43 | -1.02              |
| A(Ir1-N43-N51)                 | 41.87 | 41.70 | -0.17              |
| D(Ir1-C2-C5-C52)               | 0.863 | -1.17 | -2.033             |
| D(C2-C5-C52-N51)               | -1.44 | 0.74  | 2.18               |
| N-substituted pyridine ligands |       |       |                    |
| C50-N58                        | 1.35  | 1.38  | 0.03               |
| N58-C59                        | 1.33  | 1.33  | 0.00               |
| C59-N51                        | 1.34  | 1.34  | 0.00               |
| N51-C52                        | 1.37  | 1.41  | 0.04               |
| C52-C53                        | 1.41  | 1.43  | 0.02               |
| C53-C50                        | 1.38  | 1.37  | 0.01               |
| C52-C5                         | 1.46  | 1.42  | 0.04               |

Table S7. The selected bond lengths ( $\text{\AA}$ ), angles ( $^\circ$ ) and dihedral angles ( $^\circ$ ) of the  $S_0$  and  $T_1$  states and the corresponding modification between the two states for **7**.

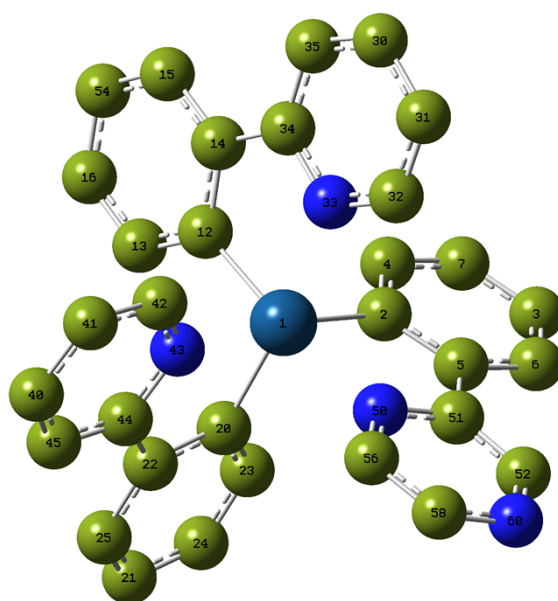

|                                | S <sub>0</sub> | T <sub>1</sub> | Δ (T <sub>1</sub> -S <sub>0</sub> ) |
|--------------------------------|----------------|----------------|-------------------------------------|
| L(Ir1-C2)                      | 2.027          | 1.985          | -0.042                              |
| L(Ir1-C12)                     | 2.028          | 2.044          | 0.016                               |
| L(Ir1-C20)                     | 2.030          | 2.022          | -0.008                              |
| L(Ir1-N33)                     | 2.190          | 2.208          | 0.018                               |
| L(Ir1-N43)                     | 2.191          | 2.211          | 0.02                                |
| L(Ir1-N50)                     | 2.177          | 2.139          | -0.038                              |
| A(Ir1-C2-N50)                  | 53.02          | 52.09          | -0.93                               |
| A(Ir1-N43-N50)                 | 41.80          | 41.49          | -0.31                               |
| D(Ir1-C2-C5-C51)               | 1.27           | -1.51          | -2.78                               |
| D(C2-C5-C51-N50)               | -1.35          | 1.00           | 2.35                                |
| N-substituted pyridine ligands |                |                |                                     |
| N60-C58                        | 1.34           | 1.39           | 0.05                                |
| C58-C56                        | 1.39           | 1.38           | 0.01                                |
| C56-N50                        | 1.34           | 1.34           | 0.00                                |
| N50-C51                        | 1.36           | 1.42           | 0.06                                |
| C51-C52                        | 1.41           | 1.42           | 0.01                                |
| C52-N60                        | 1.33           | 1.32           | 0.01                                |
| C51-C5                         | 1.46           | 1.42           | 0.04                                |

Table S8. The selected bond lengths (Å), angles (°) and dihedral angles (°) of the S<sub>0</sub> and T<sub>1</sub> states and the corresponding modification between the two states for **8**.



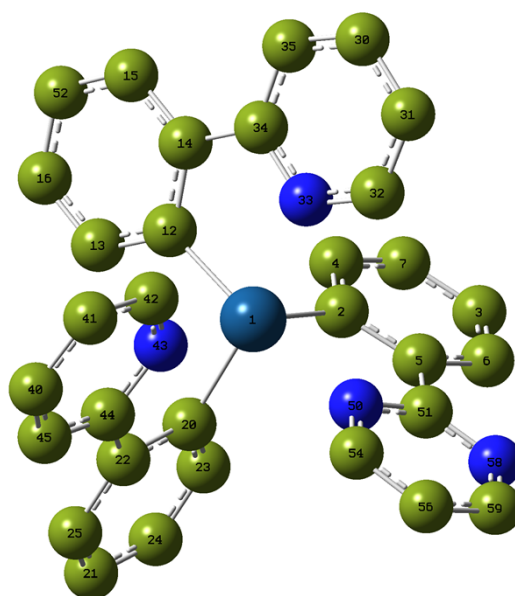

|                                | $S_0$ | $T_1$ | $\Delta (T_1-S_0)$ |
|--------------------------------|-------|-------|--------------------|
| L(Ir1-C2)                      | 2.029 | 1.982 | -0.047             |
| L(Ir1-C12)                     | 2.028 | 2.038 | 0.01               |
| L(Ir1-C20)                     | 2.028 | 2.026 | -0.002             |
| L(Ir1-N33)                     | 2.190 | 2.201 | 0.011              |
| L(Ir1-N43)                     | 2.190 | 2.220 | 0.03               |
| L(Ir1-N50)                     | 2.193 | 2.164 | -0.029             |
| A(Ir1-C2-N50)                  | 53.33 | 52.28 | -1.05              |
| A(Ir1-N43-N50)                 | 42.02 | 41.84 | -0.18              |
| D(Ir1-C2-C5-C51)               | 1.53  | -0.29 | -1.82              |
| D(C2-C5-C51-N50)               | -1.41 | 0.48  | 1.89               |
| N-substituted pyridine ligands |       |       |                    |
| C59-C56                        | 1.40  | 1.43  | 0.03               |
| C56-C54                        | 1.39  | 1.39  | 0.00               |
| C54-N50                        | 1.34  | 1.34  | 0.00               |
| N50-C51                        | 1.37  | 1.41  | 0.04               |
| C51-N58                        | 1.34  | 1.37  | 0.03               |
| N58-C59                        | 1.33  | 1.32  | 0.01               |
| C51-C5                         | 1.46  | 1.41  | 0.05               |

Table S9. The selected bond lengths ( $\text{\AA}$ ), angles ( $^\circ$ ) and dihedral angles ( $^\circ$ ) of the  $S_0$  and  $T_1$  states and the corresponding modification between the two states for **9**.

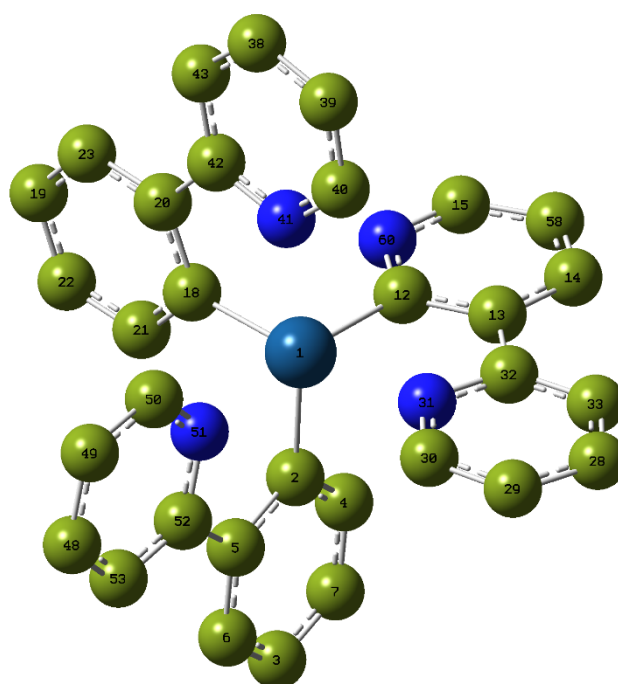

|                               | $S_0$  | $T_1$  | $\Delta (T_1-S_0)$ |
|-------------------------------|--------|--------|--------------------|
| L(Ir1-C2)                     | 2.029  | 2.022  | 0.007              |
| L(Ir1-C12)                    | 2.009  | 1.980  | -0.029             |
| L(Ir1-C18)                    | 2.025  | 2.037  | 0.012              |
| L(Ir1-N31)                    | 2.196  | 2.154  | -0.042             |
| L(Ir1-N41)                    | 2.188  | 2.200  | 0.012              |
| L(Ir1-N51)                    | 2.199  | 2.228  | 0.029              |
| A(Ir1-C12-N31)                | 53.54  | 52.15  | -1.39              |
| A(Ir1-N51-N31)                | 42.06  | 41.52  | -0.54              |
| D(Ir1-C12-C13-C32)            | 0.311  | -2.256 | -2.567             |
| D(C12-C13-C32-N31)            | -1.621 | -1.542 | 3.163              |
| N-substituted benzene ligands |        |        |                    |
| C14-C13                       | 1.400  | 1.437  | 0.037              |
| C13-C12                       | 1.436  | 1.490  | 0.054              |
| C12-N60                       | 1.351  | 1.332  | -0.019             |
| N60-C15                       | 1.336  | 1.344  | 0.008              |
| C15-C58                       | 1.398  | 1.422  | 0.024              |
| C58-C14                       | 1.389  | 1.372  | -0.017             |
| C13-C32                       | 1.463  | 1.402  | -0.061             |

Table S10. The selected bond lengths ( $\text{\AA}$ ), angles ( $^\circ$ ) and dihedral angles ( $^\circ$ ) of the  $S_0$  and  $T_1$  states and the corresponding modification between the two states for **10**.

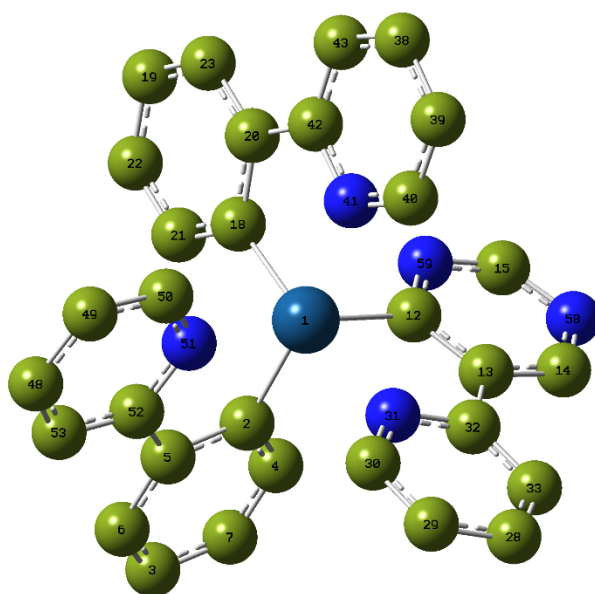

|                                | S <sub>0</sub> | T <sub>1</sub> | Δ (T <sub>1</sub> -S <sub>0</sub> ) |
|--------------------------------|----------------|----------------|-------------------------------------|
| L(Ir1-C2)                      | 2.031          | 1.984          | -0.047                              |
| L(Ir1-C12)                     | 1.997          | 2.013          | 0.016                               |
| L(Ir1-C18)                     | 2.025          | 2.023          | -0.002                              |
| L(Ir1-N31)                     | 2.205          | 2.220          | 0.015                               |
| L(Ir1-N41)                     | 2.191          | 2.211          | 0.02                                |
| L(Ir1-N51)                     | 2.198          | 2.164          | -0.034                              |
| A(Ir1-C12-N31)                 | 53.89          | 53.87          | -0.02                               |
| A(Ir1-N51-N31)                 | 42.22          | 43.75          | 1.53                                |
| D(Ir1-C12-C13-C32)             | -0.41          | -1.04          | -0.63                               |
| D(C12-C13-C32-N31)             | -1.87          | -1.65          | 0.22                                |
| 2N-substituted benzene ligands |                |                |                                     |
| C14-C13                        | 1.39           | 1.40           | 0.01                                |
| C13-C12                        | 1.43           | 1.43           | 0.00                                |
| C12-N59                        | 1.35           | 1.35           | 0.00                                |
| N59-C15                        | 1.33           | 1.33           | 0.00                                |
| C15-N58                        | 1.34           | 1.34           | 0.00                                |
| N58-C14                        | 1.34           | 1.34           | 0.00                                |
| C13-C32                        | 1.46           | 1.46           | 0.00                                |

Table S11. The selected bond lengths (Å), angles (°) and dihedral angles (°) of the S<sub>0</sub> and T<sub>1</sub> states and the corresponding modification between the two states for **11**.

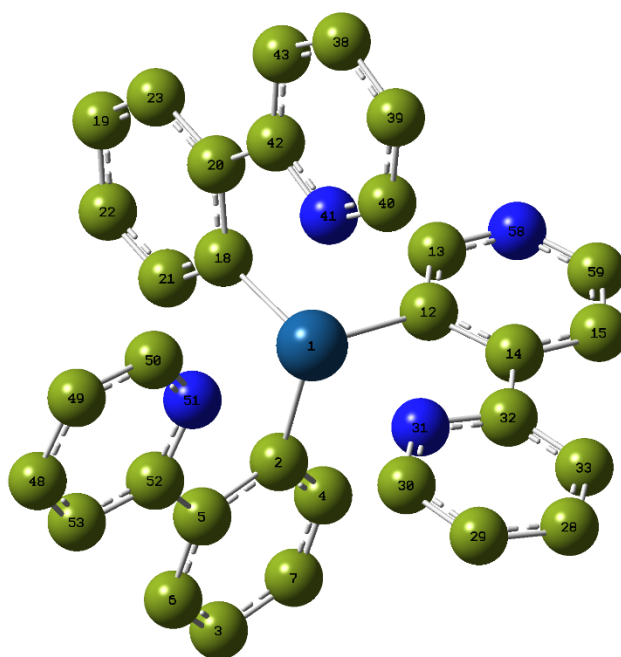

|                               | $S_0$  | $T_1$  | $\Delta (T_1-S_0)$ |
|-------------------------------|--------|--------|--------------------|
| L(Ir1-C2)                     | 2.029  | 2.027  | -0.002             |
| L(Ir1-C12)                    | 2.023  | 1.968  | -0.055             |
| L(Ir1-C18)                    | 2.026  | 2.039  | 0.013              |
| L(Ir1-N31)                    | 2.197  | 2.175  | -0.022             |
| L(Ir1-N41)                    | 2.192  | 2.200  | 0.008              |
| L(Ir1-N51)                    | 2.185  | 2.223  | 0.038              |
| A(Ir1-C12-N31)                | 53.67  | 52.99  | -0.068             |
| A(Ir1-N51-N31)                | 42.00  | 41.93  | -0.07              |
| D(Ir1-C12-C14-C32)            | 1.175  | -2.095 | -3.27              |
| D(C12-C14-C32-N31)            | -1.493 | 0.964  | 2.457              |
| N-substituted benzene ligands |        |        |                    |
| C15-C14                       | 1.404  | 1.422  | 0.018              |
| C14-C12                       | 1.420  | 1.480  | 0.06               |
| C12-C13                       | 1.412  | 1.416  | 0.004              |
| C13-N58                       | 1.338  | 1.336  | -0.002             |
| N58-C59                       | 1.343  | 1.370  | 0.027              |
| C59-C15                       | 1.388  | 1.378  | -0.01              |
| C14-C32                       | 1.468  | 1.411  | -0.057             |

Table S12. Selected reorganization energy  $E_r$  ( $\text{cm}^{-1}$ ) and the vibrational normal mode frequencies  $\omega$  ( $\text{cm}^{-1}$ ) for **1-11**.

| 1        |       | 2        |       | 3        |       | 4        |       | 5        |       | 6        |       | 7        |       |
|----------|-------|----------|-------|----------|-------|----------|-------|----------|-------|----------|-------|----------|-------|
| $\omega$ | $E_r$ |
| 42       | 11    | 41       | 9     | 31       | 13    | 20       | 5     | 31       | 17    | 30       | 9     | 33       | 7     |
| 50       | 5     | 50       | 6     | 37       | 11    | 37       | 2     | 32       | 54    | 31       | 7     | 42       | 13    |
| 85       | 7     | 162      | 11    | 51       | 1     | 46       | 22    | 42       | 52    | 41       | 17    | 43       | 8     |
| 162      | 6     | 204      | 10    | 155      | 4     | 112      | 7     | 49       | 22    | 50       | 13    | 50       | 10    |
| 163      | 8     | 228      | 12    | 163      | 7     | 170      | 11    | 81       | 64    | 85       | 10    | 85       | 5     |
| 205      | 10    | 229      | 21    | 191      | 3     | 179      | 27    | 117      | 70    | 147      | 19    | 118      | 8     |
| 230      | 29    | 259      | 37    | 232      | 13    | 218      | 3     | 118      | 435   | 160      | 28    | 123      | 7     |
| 260      | 42    | 271      | 20    | 262      | 71    | 238      | 23    | 148      | 68    | 162      | 5     | 162      | 6     |
| 271      | 26    | 302      | 16    | 303      | 34    | 275      | 16    | 163      | 264   | 203      | 9     | 205      | 20    |
| 303      | 33    | 303      | 17    | 382      | 12    | 288      | 58    | 164      | 118   | 228      | 14    | 205      | 6     |
| 376      | 14    | 378      | 16    | 444      | 9     | 325      | 16    | 187      | 33    | 229      | 60    | 227      | 35    |
| 455      | 9     | 453      | 11    | 447      | 3     | 466      | 13    | 204      | 159   | 258      | 70    | 260      | 59    |
| 643      | 7     | 644      | 9     | 643      | 5     | 672      | 18    | 204      | 62    | 271      | 44    | 270      | 13    |
| 644      | 5     | 653      | 22    | 650      | 5     | 682      | 22    | 229      | 288   | 272      | 9     | 272      | 14    |
| 653      | 10    | 653      | 6     | 653      | 14    | 686      | 83    | 262      | 34    | 302      | 32    | 304      | 41    |
| 654      | 16    | 679      | 44    | 679      | 38    | 742      | 2     | 271      | 180   | 304      | 14    | 376      | 15    |
| 678      | 10    | 682      | 26    | 683      | 44    | 777      | 12    | 276      | 42    | 376      | 10    | 463      | 25    |
| 679      | 28    | 690      | 19    | 699      | 10    | 782      | 87    | 278      | 91    | 452      | 6     | 486      | 6     |
| 684      | 52    | 775      | 43    | 749      | 2     | 1024     | 31    | 286      | 48    | 492      | 13    | 491      | 7     |
| 776      | 52    | 777      | 23    | 776      | 45    | 1030     | 45    | 303      | 464   | 639      | 9     | 519      | 6     |
| 778      | 9     | 1024     | 5     | 777      | 18    | 1036     | 25    | 305      | 86    | 670      | 80    | 525      | 14    |
| 1025     | 62    | 1026     | 27    | 1026     | 92    | 1039     | 2     | 376      | 14    | 682      | 7     | 640      | 99    |
| 1026     | 47    | 1026     | 74    | 1051     | 128   | 1040     | 8     | 376      | 29    | 713      | 19    | 659      | 16    |
| 1039     | 23    | 1039     | 21    | 1055     | 45    | 1051     | 71    | 428      | 108   | 784      | 10    | 691      | 36    |
| 1040     | 7     | 1040     | 6     | 1064     | 17    | 1052     | 36    | 442      | 257   | 1025     | 19    | 797      | 114   |
| 1051     | 70    | 1051     | 114   | 1086     | 33    | 1061     | 25    | 454      | 25    | 1025     | 76    | 1033     | 15    |
| 1051     | 77    | 1057     | 87    | 1087     | 4     | 1081     | 3     | 485      | 40    | 1047     | 32    | 1038     | 17    |
| 1061     | 40    | 1085     | 44    | 1088     | 14    | 1083     | 4     | 489      | 172   | 1050     | 102   | 1048     | 63    |
| 1086     | 39    | 1131     | 14    | 1130     | 14    | 1112     | 43    | 490      | 30    | 1051     | 6     | 1051     | 40    |
| 1131     | 23    | 1133     | 14    | 1193     | 86    | 1153     | 34    | 519      | 19    | 1061     | 16    | 1051     | 24    |
| 1135     | 8     | 1155     | 5     | 1272     | 10    | 1166     | 52    | 521      | 99    | 1084     | 19    | 1061     | 24    |
| 1185     | 20    | 1185     | 21    | 1300     | 2     | 1192     | 40    | 588      | 31    | 1088     | 8     | 1109     | 53    |
| 1193     | 87    | 1193     | 88    | 1316     | 12    | 1269     | 16    | 683      | 22    | 1110     | 9     | 1153     | 18    |
| 1271     | 9     | 1270     | 8     | 1333     | 73    | 1334     | 29    | 763      | 17    | 1153     | 15    | 1190     | 29    |
| 1317     | 13    | 1316     | 16    | 1335     | 18    | 1335     | 26    | 784      | 27    | 1193     | 12    | 1272     | 79    |
| 1335     | 84    | 1333     | 73    | 1346     | 77    | 1341     | 91    | 786      | 36    | 1208     | 45    | 1274     | 7     |
| 1337     | 8     | 1335     | 6     | 1347     | 37    | 1410     | 33    | 1019     | 118   | 1346     | 19    | 1305     | 54    |
| 1347     | 111   | 1346     | 128   | 1460     | 45    | 1471     | 102   | 1026     | 17    | 1347     | 17    | 1336     | 7     |
| 1459     | 8     | 1459     | 49    | 1478     | 10    | 1482     | 152   | 1030     | 13    | 1363     | 81    | 1338     | 28    |
| 1460     | 37    | 1479     | 13    | 1490     | 222   | 1508     | 220   | 1051     | 31    | 1430     | 85    | 1359     | 107   |
| 1479     | 7     | 1490     | 165   | 1491     | 2     | 1515     | 8     | 1058     | 55    | 1467     | 124   | 1440     | 94    |
| 1489     | 153   | 1490     | 40    | 1511     | 35    | 1587     | 307   | 1081     | 14    | 1482     | 83    | 1470     | 20    |

|      |     |      |     |      |     |      |    |      |     |      |     |      |     |
|------|-----|------|-----|------|-----|------|----|------|-----|------|-----|------|-----|
| 1490 | 57  | 1513 | 208 | 1514 | 158 | 1604 | 2  | 1089 | 11  | 1511 | 87  | 1487 | 125 |
| 1513 | 132 | 1516 | 73  | 1516 | 81  | 1632 | 34 | 1144 | 15  | 1514 | 50  | 1512 | 121 |
| 1516 | 138 | 1597 | 99  | 1597 | 184 | 1640 | 28 | 1213 | 45  | 1581 | 128 | 1516 | 36  |
| 1597 | 86  | 1598 | 133 | 1598 | 42  | 1641 | 28 | 1244 | 67  | 1634 | 87  | 1517 | 5   |
| 1597 | 122 | 1615 | 16  | 1614 | 5   |      |    | 1301 | 20  | 1642 | 20  | 1565 | 372 |
| 1615 | 27  | 1616 | 40  | 1615 | 30  |      |    | 1348 | 64  |      |     | 1629 | 16  |
| 1615 | 11  | 1639 | 50  | 1616 | 21  |      |    | 1407 | 210 |      |     | 1640 | 14  |
| 1616 | 22  | 1641 | 50  | 1639 | 55  |      |    | 1476 | 52  |      |     | 1642 | 13  |
| 1639 | 55  | 1653 | 44  | 1641 | 44  |      |    | 1478 | 15  |      |     |      |     |
| 1642 | 41  | 1654 | 23  | 1653 | 14  |      |    | 1490 | 17  |      |     |      |     |
| 1652 | 35  |      |     |      |     |      |    | 1597 | 12  |      |     |      |     |
| 1653 | 28  |      |     |      |     |      |    | 1602 | 35  |      |     |      |     |
|      |     |      |     |      |     |      |    | 1634 | 305 |      |     |      |     |

Table S12 (continued). Selected reorganization energy  $E_r$  (cm<sup>-1</sup>) and the vibrational normal mode frequencies  $\omega$  (cm<sup>-1</sup>) for **1-11**.

| 7        |       | 9        |       | 10       |       | 11       |       |
|----------|-------|----------|-------|----------|-------|----------|-------|
| $\omega$ | $E_r$ | $\omega$ | $E_r$ | $\omega$ | $E_r$ | $\omega$ | $E_r$ |
| 34       | 5     | 29       | 4     | 30       | 10    | 30       | 15    |
| 43       | 15    | 30       | 3     | 158      | 10    | 40       | 10    |
| 50       | 8     | 40       | 13    | 203      | 5     | 50       | 7     |
| 84       | 7     | 48       | 5     | 227      | 19    | 85       | 11    |
| 117      | 5     | 82       | 7     | 232      | 23    | 115      | 9     |
| 146      | 9     | 119      | 8     | 257      | 39    | 147      | 11    |
| 160      | 23    | 160      | 14    | 272      | 9     | 161      | 13    |
| 205      | 13    | 198      | 4     | 275      | 6     | 203      | 14    |
| 226      | 43    | 227      | 14    | 300      | 35    | 227      | 82    |
| 259      | 60    | 258      | 37    | 304      | 5     | 260      | 84    |
| 269      | 25    | 272      | 15    | 379      | 13    | 270      | 55    |
| 274      | 11    | 385      | 5     | 451      | 10    | 303      | 64    |
| 302      | 54    | 519      | 9     | 643      | 5     | 376      | 8     |
| 377      | 7     | 637      | 13    | 644      | 7     | 454      | 9     |
| 445      | 5     | 653      | 18    | 653      | 20    | 593      | 20    |
| 499      | 13    | 692      | 112   | 654      | 8     | 641      | 50    |
| 679      | 92    | 775      | 3     | 680      | 51    | 722      | 103   |
| 680      | 28    | 793      | 30    | 683      | 22    | 776      | 5     |
| 684      | 35    | 820      | 2     | 695      | 12    | 781      | 2     |
| 777      | 6     | 1022     | 66    | 776      | 48    | 975      | 4     |
| 788      | 64    | 1025     | 13    | 777      | 21    | 1025     | 14    |
| 1022     | 109   | 1026     | 12    | 1026     | 29    | 1029     | 82    |
| 1048     | 97    | 1033     | 63    | 1027     | 75    | 1046     | 56    |
| 1051     | 21    | 1040     | 4     | 1039     | 25    | 1055     | 41    |
| 1053     | 9     | 1057     | 13    | 1052     | 143   | 1062     | 37    |
| 1060     | 7     | 1077     | 87    | 1058     | 63    | 1090     | 25    |
| 1078     | 32    | 1084     | 34    | 1086     | 20    | 1116     | 20    |

---

|      |     |      |     |      |     |      |     |
|------|-----|------|-----|------|-----|------|-----|
| 1108 | 29  | 1102 | 35  | 1087 | 27  | 1132 | 18  |
| 1124 | 32  | 1132 | 8   | 1131 | 19  | 1136 | 29  |
| 1151 | 6   | 1137 | 15  | 1132 | 6   | 1187 | 49  |
| 1187 | 16  | 1155 | 28  | 1155 | 8   | 1199 | 48  |
| 1248 | 25  | 1158 | 13  | 1185 | 24  | 1283 | 33  |
| 1275 | 16  | 1188 | 75  | 1195 | 90  | 1334 | 15  |
| 1277 | 11  | 1267 | 16  | 1276 | 15  | 1344 | 132 |
| 1291 | 32  | 1312 | 11  | 1317 | 13  | 1434 | 33  |
| 1372 | 21  | 1327 | 10  | 1333 | 83  | 1465 | 68  |
| 1447 | 194 | 1343 | 188 | 1345 | 123 | 1493 | 186 |
| 1471 | 18  | 1410 | 32  | 1461 | 7   | 1510 | 231 |
| 1490 | 9   | 1479 | 46  | 1461 | 33  | 1513 | 31  |
| 1491 | 19  | 1513 | 41  | 1478 | 15  | 1575 | 99  |
| 1494 | 296 | 1516 | 313 | 1491 | 35  | 1615 | 87  |
| 1589 | 221 | 1581 | 209 | 1491 | 199 | 1653 | 22  |
| 1633 | 120 | 1615 | 115 | 1513 | 209 |      |     |
|      |     | 1633 | 247 | 1514 | 37  |      |     |
|      |     | 1651 | 84  | 1516 | 32  |      |     |
|      |     | 1654 | 27  | 1598 | 38  |      |     |
|      |     |      |     | 1599 | 195 |      |     |
|      |     |      |     | 1615 | 6   |      |     |
|      |     |      |     | 1616 | 48  |      |     |
|      |     |      |     | 1640 | 95  |      |     |
|      |     |      |     | 1643 | 12  |      |     |
|      |     |      |     | 1653 | 59  |      |     |
|      |     |      |     | 1654 | 7   |      |     |

---

Table S13. Relative Energy Gaps (in kcal/mol) Between the Stationary Points along the MLCT  $\rightarrow$   $^3$ MC  $\rightarrow$   $^1$ GS Channels and the  $^3$ MLCT State for **1-7**.

| Complex | MLCT | TS    | MC    | MECP  |
|---------|------|-------|-------|-------|
| 1       | 0.00 | 7.18  | 6.13  | 6.21  |
| 2       | 0.00 | 8.71  | 2.35  | 2.45  |
| 3       | 0.00 | 12.61 | 7.57  | 7.64  |
| 4       | 0.00 | 10.22 | 4.45  | 15.89 |
| 5       | 0.00 | 14.33 | 13.45 | 13.54 |
| 6       | 0.00 | 9.84  | 9.44  | 9.88  |
| 7-1     | 0.00 | 11.00 | 9.96  | 10.03 |
| 7-2     | 0.00 | 13.01 | 12.92 | 13.29 |
| 8       | 0.00 | -     | 7.05  | 7.52  |
| 9       | 0.00 | 26.04 | 8.12  | 8.14  |
| 10-1    | 0.00 | 6.98  | 5.46  | 5.58  |
| 10-2    | 0.00 | 8.86  | 8.77  | 9.29  |
| 11      | 0.00 | 23.37 | 16.45 | 19.57 |

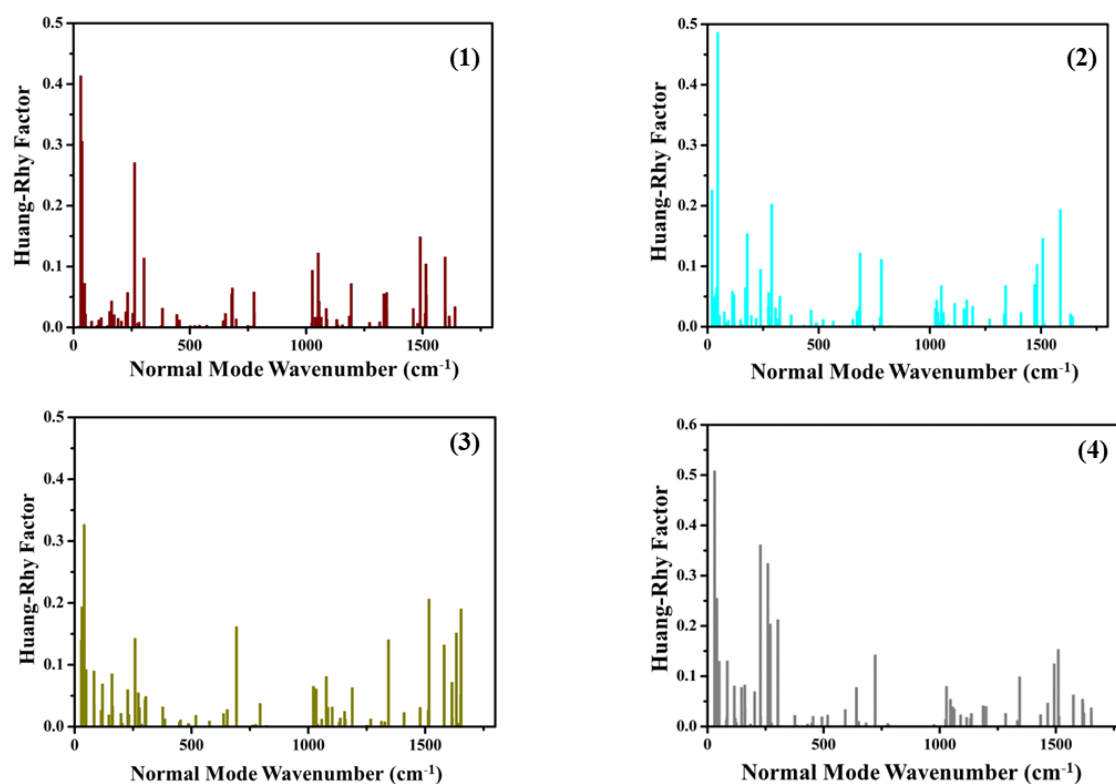

**Figure. S2** The calculated Huang-Rhys factors versus the normal mode wavenumber at the ground state for **complexes 3, 4, 9 and 11.**



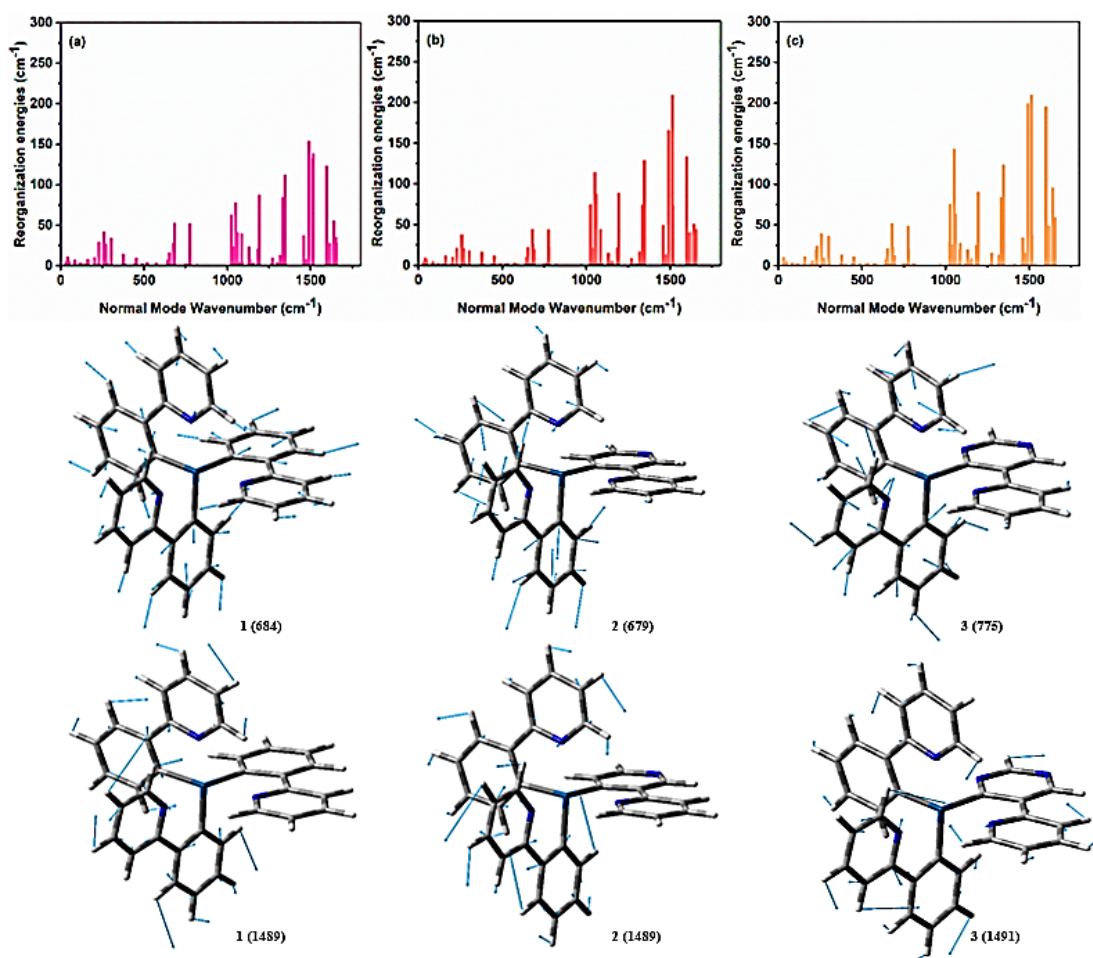

**Figure S3.** Positive mode displacement vectors with maximum reorganization energy and regularized mode frequencies for complexes **1 (a)**, **2 (b)** and **10 (c)**.

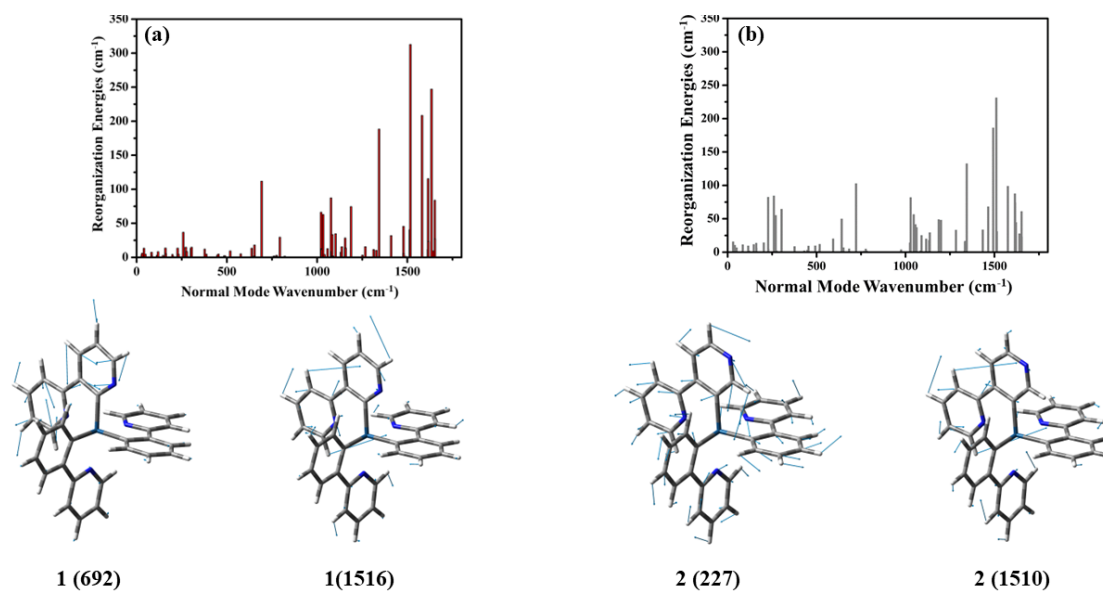

**Figure S4.** Positive mode displacement vectors with maximum reorganization energy and regularized mode frequencies for complexes **9 (a)** and **11 (b)**.

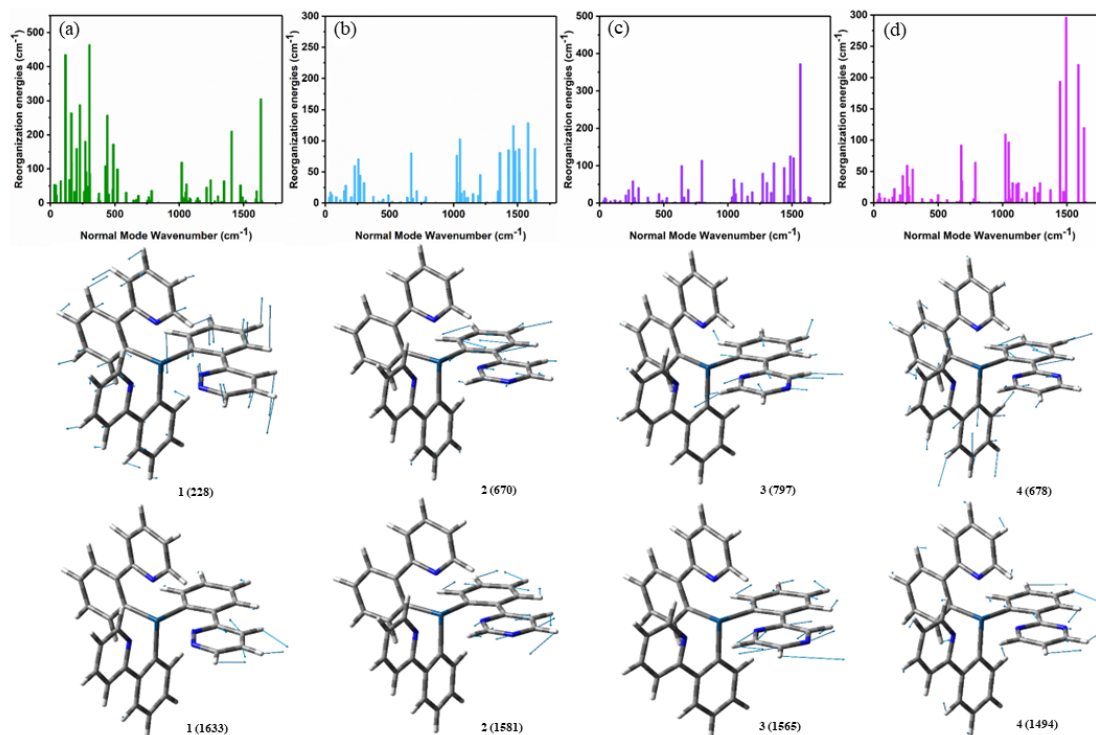

**Figure S5.** Positive-mode displacement vectors with maximum reorganization energy and regularized mode frequencies for complexes **5 (a)**, **6 (b)**, **7 (c)** and **8 (d)**.

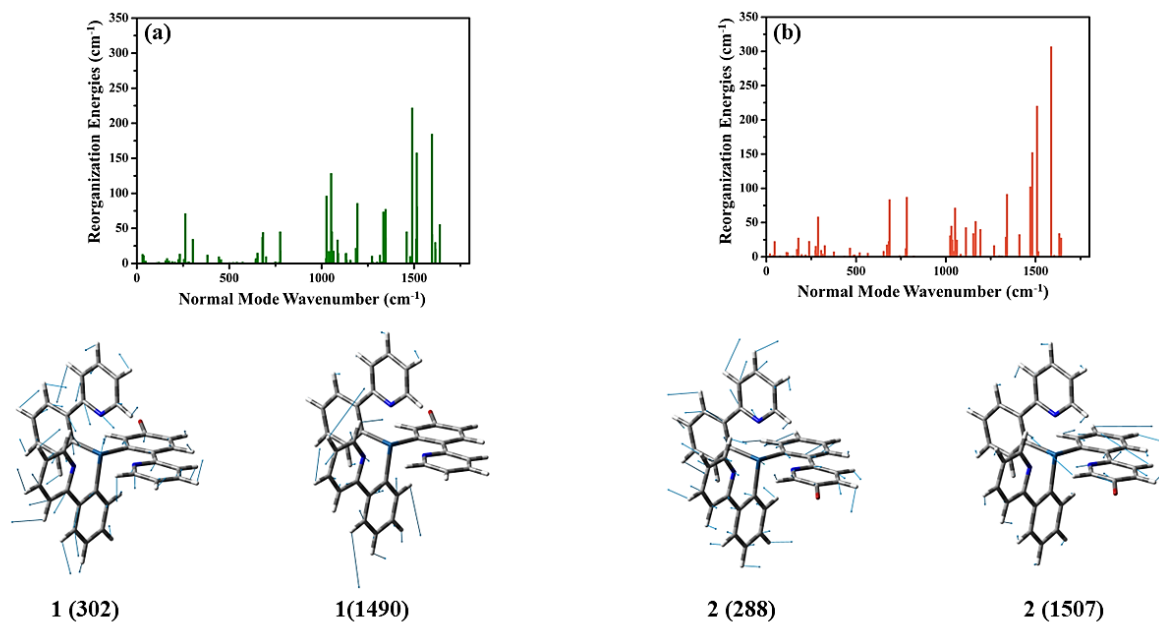

**Figure S6.** Positive-mode displacement vectors with maximum reorganization energy and regularized mode frequencies for complexes **3 (a)** and **4 (b)**.

**Table S14. Important structural parameters calculated separately in the S<sub>0</sub> state using vacuum and solvent models.**

|                  | Vacuum | CH <sub>2</sub> Cl <sub>2</sub> | Δ (Vacuum - CH <sub>2</sub> Cl <sub>2</sub> ) |
|------------------|--------|---------------------------------|-----------------------------------------------|
| L(Ir1-C2)        | 2.026  | 2.028                           | 0.002                                         |
| L(Ir1-C12)       | 2.027  | 2.027                           | 0.000                                         |
| L(Ir1-C18)       | 2.027  | 2.028                           | 0.001                                         |
| L(Ir1-N31)       | 2.190  | 2.189                           | -0.001                                        |
| L(Ir1-N41)       | 2.189  | 2.189                           | 0.000                                         |
| L(Ir1-N51)       | 2.190  | 2.188                           | -0.002                                        |
| A(Ir1-C2-N51)    | 53.33  | 53.33                           | 0.000                                         |
| A(Ir1-N41-N51)   | 41.87  | 41.87                           | 0.000                                         |
| D(Ir1-C2-C5-C52) | 0.580  | 1.306                           | 0.726                                         |
| D(C2-C5-C52-N51) | -1.420 | -1.435                          | -0.015                                        |
| Benzene ligands  |        |                                 |                                               |
| C6-C5            | 1.41   | 1.41                            | 0.000                                         |
| C5-C2            | 1.43   | 1.43                            | 0.000                                         |
| C2-C4            | 1.41   | 1.41                            | 0.000                                         |
| C4-C7            | 1.39   | 1.39                            | 0.000                                         |
| C7-C3            | 1.40   | 1.40                            | 0.000                                         |
| C3-C6            | 1.39   | 1.39                            | 0.000                                         |
| C5-C52           | 1.46   | 1.47                            | 0.010                                         |
| Pyridine ligands |        |                                 |                                               |
| C48-C49          | 1.40   | 1.40                            | 0.000                                         |
| C49-C50          | 1.39   | 1.39                            | 0.000                                         |
| C50-N51          | 1.34   | 1.34                            | 0.000                                         |
| N51-C52          | 1.36   | 1.36                            | 0.000                                         |
| C52-C53          | 1.41   | 1.41                            | 0.000                                         |
| C53-C48          | 1.39   | 1.39                            | 0.000                                         |

**Table S15. Important structural parameters calculated separately in the T<sub>1</sub> state using vacuum and solvent models.**

|                  | Vacuum | CH <sub>2</sub> Cl <sub>2</sub> | Δ (Vacuum - CH <sub>2</sub> Cl <sub>2</sub> ) |
|------------------|--------|---------------------------------|-----------------------------------------------|
| L(Ir1-C2)        | 2.041  | 2.040                           | -0.001                                        |
| L(Ir1-C12)       | 2.023  | 2.027                           | 0.004                                         |
| L(Ir1-C18)       | 1.983  | 1.984                           | 0.001                                         |
| L(Ir1-N31)       | 2.213  | 2.217                           | 0.004                                         |
| L(Ir1-N41)       | 2.156  | 2.158                           | 0.002                                         |
| L(Ir1-N51)       | 2.205  | 2.198                           | -0.007                                        |
| A(Ir1-C2-N51)    | 53.35  | 53.20                           | -0.15                                         |
| A(Ir1-N41-N51)   | 43.37  | 43.20                           | -0.17                                         |
| D(Ir1-C2-C5-C52) | 0.60   | 0.26                            | -0.34                                         |
| D(C2-C5-C52-N51) | -1.52  | -0.45                           | 1.07                                          |
| Benzene ligands  |        |                                 |                                               |
| C6-C5            | 1.41   | 1.41                            | 0.000                                         |
| C5-C2            | 1.43   | 1.43                            | 0.000                                         |
| C2-C4            | 1.41   | 1.41                            | 0.000                                         |
| C4-C7            | 1.39   | 1.39                            | 0.000                                         |
| C7-C3            | 1.40   | 1.40                            | 0.000                                         |
| C3-C6            | 1.39   | 1.39                            | 0.000                                         |
| C5-C52           | 1.46   | 1.47                            | 0.010                                         |
| Pyridine ligands |        |                                 |                                               |
| C48-C49          | 1.40   | 1.40                            | 0.000                                         |
| C49-C50          | 1.39   | 1.39                            | 0.000                                         |
| C50-N51          | 1.34   | 1.34                            | 0.000                                         |
| N51-C52          | 1.36   | 1.36                            | 0.000                                         |
| C52-C53          | 1.41   | 1.41                            | 0.000                                         |
| C53-C48          | 1.39   | 1.39                            | 0.000                                         |
